# Supplementary material for: Isotopic measurements in water vapor, precipitation, and seawater during EUREC 4 A
Source: Copernicus journal article supplement (doi:10.5194/essd-15-465-2023), 2023-01-31
Supplement: Supplementary file 1 [file ATR_Cals.xlsx]

## Sheet: Calibrations
STD1
startdate [yyyy/mm/dd]	starttime [HH:MM:SS]	enddate [HH:MM:SS]	H2Om [ppmv]	H2Os [ppmv]	d18Om [‰]	d18O drift [‰ d-1]	d18Os [‰]	d2Hm [‰]	d2H drift [‰ d-1]	d2Hs [‰]	d18Otarget [‰]	d18Otargets [‰]	d2Htarget [‰]	d2Htargets [‰]	name	datesample	type
2020/01/25	20:33:16	20:43:15	20747	210	-0.95		0.47	-54.31		1.23	-11.51	0.16	-86.74	0.6	MPI	2020/01/21	ground
2020/01/25	19:48:57	19:58:54	20965	66	-0.77		0.17	-52.56		1.21	-11.51	0.16	-86.74	0.6	MPI	2020/01/21	ground
2020/01/25	21:59:58	22:09:57	20821	212	-0.85		0.48	-54.87		1.01	-11.51	0.16	-86.74	0.6	MPI	2020/01/21	ground
2020/01/28	14:43:59	14:53:57	20979	901	-0.59	-0.0888889	0.98	-53.33	-0.194444	1.95	-11.51	0.16	-86.74	0.6	MPI	2020/01/21	ground
2020/01/30	16:41:05	16:51:05	20831	48	-0.88	0.145	0.17	-55.35	1.01	1.29	-11.51	0.16	-86.74	0.6	MPI	2020/01/21	ground
2020/01/31	13:37:04	13:47:03	20923	52	-0.77	-0.11	0.17	-54.9	-0.45	1.24	-11.12	0.16	-80.42	0.6	MPI	2020/01/31	ground
2020/02/02	22:09:07	22:19:05	20810	79	-1.09	0.16	0.2	-54.72	-0.09	1.2	-11.12	0.16	-80.42	0.6	MPI	2020/01/31	ground
2020/02/05	19:22:10	19:32:08	21345	137	-1.43	-0.0116667	0.2	-58.68	0.57	1.28	-11.12	0.16	-80.42	0.6	MPI	2020/01/31	ground
2020/02/05	19:57:06	20:07:05	20976	183	-0.68		0.19	-54.18		1.27	-11.12	0.16	-80.42	0.6	MPI	2020/01/31	ground
2020/02/07	23:01:54	23:11:54	21227	139	-0.96	-0.0475	0.21	-56.11	-0.16	1.21	-11.12	0.16	-80.42	0.6	MPI	2020/01/31	ground
2020/02/09	10:46:23	10:56:28	20310	229	-0.86		0.27	-54.84		1.19	-11.41	0.16	-82.68	0.6	MPI	2020/02/09	in-flight
2020/02/09	13:19:55	13:29:54	20721	90	-0.86	-0.05	0.19	-54.46	-0.825	1.05	-11.41	0.16	-82.68	0.6	MPI	2020/02/09	ground
2020/02/09	16:18:35	16:28:34	20059	354	-0.75		0.22	-53.81		1.26	-11.41	0.16	-82.68	0.6	MPI	2020/02/09	in-flight
2020/02/09	18:35:11	18:45:09	20735	97	-0.8		0.22	-54.6		1.14	-11.41	0.16	-82.68	0.6	MPI	2020/02/09	ground
2020/02/13	18:30:17	18:40:16	20999	101	-1	0.05	0.17	-54.42	-0.045	1.14	-11.26	0.16	-81.18	0.6	MPI	2020/02/13	ground
mean			20829.9	274	-0.882667	0.00586806	0.287333	-54.7427	-0.0230556	1.24467	-11.3367	0.16	-83.18	0.6
std					0.197393	0.102639		1.36616	0.572888		0.144145		1.12566
max						0.16			1.01
min						-0.11			-0.825
STD2
startdate [yyyy/mm/dd]	starttime [HH:MM:SS]	enddate [HH:MM:SS]	H2Om [ppmv]	H2Os [ppmv]	d18Om [‰]	d18O drift [‰ d-1]	d18Os [‰]	d2Hm [‰]	d2H drift [‰ d-1]	d2Hs [‰]	d18Otarget [‰]	d18Otargets [‰]	d2Htarget [‰]	d2Htargets [‰]	name	datesample	type
2020/01/24	16:11:13	16:31:12	20690	113	-30.71		0.26	-311.06		1.35	-37.24	0.16	-303.98	0.6	TALOS	2020/01/21	ground
2020/01/24	16:38:23	16:46:27	21023	103	-30.58		0.3	-310.2		1.22	-37.24	0.16	-303.98	0.6	TALOS	2020/01/21	ground
2020/01/25	13:16:56	13:26:56	21023	46	-30.64	0.246667	0.17	-309.52	-0.416667	1.31	-37.24	0.16	-303.98	0.6	TALOS	2020/01/21	ground
2020/01/25	20:17:07	20:27:04	20880	57	-30.57		0.17	-308.79		1.22	-37.24	0.16	-303.98	0.6	TALOS	2020/01/21	ground
2020/01/25	21:43:49	21:53:47	20368	148	-31.27		0.21	-311.04		1.21	-37.24	0.16	-303.98	0.6	TALOS	2020/01/21	ground
2020/01/28	14:27:50	14:37:47	20923	43	-30.56	-0.236667	0.23	-309.62	-0.473333	1.37	-37.24	0.16	-303.98	0.6	TALOS	2020/01/21	ground
2020/01/30	16:57:15	17:07:14	20938	226	-29.9	-0.33	0.24	-309.58	-0.02	1.22	-37.24	0.16	-303.98	0.6	TALOS	2020/01/21	ground
mean			20835	147.5	-19.7014	-0.106667	0.225714	-212.019	-0.0275209	1.27143	-37.24	0.16	-303.98	0.6
std					15.1333	0.309534		136.768	0.588397		0		0
max						0.246667			1.01
min						-0.33			-0.825
STD3
startdate [yyyy/mm/dd]	starttime [HH:MM:SS]	enddate [HH:MM:SS]	H2Om [ppmv]	H2Os [ppmv]	d18Om [‰]	d18O drift [‰ d-1]	d18Os [‰]	d2Hm [‰]	d2H drift [‰ d-1]	d2Hs [‰]	d18Otarget [‰]	d18Otargets [‰]	d2Htarget [‰]	d2Htargets [‰]	name	datesample	type
2020/01/31	13:53:13	14:03:11	20635	397	-47.3		0.56	-432.46		1.15	-55.16	0.16	-434.98	0.6	UBE	2020/01/31	ground
2020/02/02	22:26:40	22:36:39	20787	68	-46.8	-0.166667	0.18	-433.31	0.283333	1.17	-55.16	0.16	-434.98	0.6	UBE	2020/01/31	ground
2020/02/05	19:38:19	19:48:18	20953	113	-46.38	-0.0416667	0.17	-430.96	-0.475	1.36	-55.16	0.16	-434.98	0.6	UBE	2020/01/31	ground
2020/02/05	20:13:15	20:21:40	20747	34	-46.97		0.16	-432.81		1.17	-55.16	0.16	-434.98	0.6	UBE	2020/01/31	ground
2020/02/07	23:17:13	23:27:12	20523	23	-46.72	-0.125	0.18	-432.6	-0.105	1.26	-55.59	0.16	-434.98	0.6	EDC	2020/02/07	ground
2020/02/09	11:02:59	11:12:57	20269	800	-46.97		0.95	-435.53		1.47	-55.79	0.16	-439.71	0.6	UBE	2020/02/09	in-flight
2020/02/09	13:36:05	13:46:04	20227	315	-47.61	0.445	0.28	-434.96	1.18	1.23	-55.79	0.16	-439.71	0.6	UBE	2020/02/09	ground
2020/02/09	17:18:55	17:28:53	17676	504	-50.7		0.55	-442.19		1.27	-55.79	0.16	-439.71	0.6	UBE	2020/02/09	in-flight
2020/02/11	17:07:20	17:17:18	19573	363	-48.71	0.55	0.59	-434.04	-0.92	1.13	-55.79	0.16	-439.71	0.6	UBE	2020/02/09	ground
2020/02/13	17:49:49	17:59:20	21234	124	-46.58	-1.065	0.2	-432.47	-0.785	1.31	-55.27	0.16	-436.03	0.6	UBE	2020/02/13	ground
mean			20262.4	373.714	-47.474	-0.0672222	0.382	-434.133	-0.136944	1.252	-55.466	0.16	-436.977	0.6
std					1.31278	0.574939		3.1264	0.782231		0.307		2.37379
max						0.55			1.18
min						-1.065			-0.92

## Sheet: WVDC_fitting_coefficients
After Weng et al. 2020 AMT https://doi.org/10.5194/amt-13-3167-2020
fcorr=a/H2O+b			with H2O: water vapour mixing ratio in ppmv
a=m/d+n*d+p			with d: delta2H or delta18O in permil, ambient water vapour isotope composition
b=q/d+r*d+s
Three liquid standards were used with isotope ratios of (–11.4±0.2)‰, (–32.4±0.2), (–50.4±0.2)‰ for d18O and (–82.1±0.6)‰, (–267.8±0.1)‰, (–390.8±0.1)‰ for dD
	Coefficients for d2H
a	m	1.87031
	n	474.958
	p	43466.4
b	q	-0.000142214
	r	-0.0221731
	s	-1.96779
	Coefficients for d18O
a	m	8.2648
	n	142.534
	p	6067.34
b	q	-0.00059871
	r	0.00597565
	s	-0.258834

## Sheet: VSMOW_SLAPnorm
Normalisation to VSMOW-SLAP using 32 calibration runs from the whole campaign and applying a linear regression
f=s*x+c
Coefficients for d2H
	coef	std err
s	0.9219	0.008
c	-30.8066	2.257
Coefficients for d18O
	coef	std err
s	0.9362	0.01
c	-10.2497	0.293

## Sheet: H2O_correction
Dew point experiment from Thurnherr et al. 2020 ACP
https://doi.org/10.5194/acp-20-5811-2020
f = s*x+c
s	c
0.734	1102.37
