# Supplementary material for: Isotopic measurements in water vapor, precipitation, and seawater during EUREC 4 A
Source: Copernicus journal article supplement (doi:10.5194/essd-15-465-2023), 2023-01-31
Supplement: Supplementary file 2 [file essd-15-465-2023-supplement.zip]

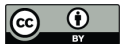

## *Supplement of*

# **Isotopic measurements in water vapor, precipitation, and seawater during EUREC<sup>4</sup>A**

**Adriana Bailey et al.**

*Correspondence to:* Adriana Bailey ([abailey@ucar.edu](mailto:abailey@ucar.edu))

- [essd-15-465-2023-supplement-title-page.pdf](#)
- [Bailey\\_EUREC4A\\_Supplemental\\_Information](#)
  - [ATR\\_Cals.xlsx](#)
  - [BCO\\_Cals.xlsx](#)
  - [EUREC4A\\_ATOMIC\\_RonBrown\\_Seawater\\_Isotope\\_Ratios\\_20200108-20200212\\_v0.0.csv](#)
  - [Supplemental\\_Information.pdf](#)

The copyright of individual parts of the supplement might differ from the article licence.
